# Supplementary material
Source: publisher figshare collection journal article supplement (https://tandf.figshare.com/articles/dataset/_/7165459)

# Supplemental Information A

## **Pharmacophore-based Discovery of 2-(Phenylamino)Aceto-Hydrazides as Potent Eosinophil Peroxidase (EPO) Inhibitors**

Daniela Schuster<sup>a</sup>, Martina Zederbauer<sup>b</sup>, Thierry Langer<sup>c</sup>, Andreas Kubin<sup>b\*</sup> Paul G. Furtmüller<sup>d\*</sup>

<sup>a</sup> *Paracelsus Medical Private University Salzburg, Institute of Pharmacy, Department of Pharmaceutical and Medicinal Chemistry, Strubergasse 13, 5020 Salzburg, Austria*

<sup>b</sup> *Planta Naturstoffe, Erlgasse 48, A-1120 Vienna, Austria*

<sup>c</sup> *Division of Drug Design and Medicinal Chemistry, Department of Pharmaceutical Chemistry, Faculty of Life Sciences, University of Vienna, Althanstr. 14, 1090 Vienna, Austria*

<sup>d</sup> *University of Natural Resources and Life Sciences, Department of Chemistry, Division of Biochemistry, Muthgasse 18, 1190 Vienna, Austria*

\* corresponding authors: Paul G. Furtmüller, University of Natural Resources and Life Sciences, Department of Chemistry, Division of Biochemistry, Muthgasse 18, 1190 Vienna, Austria, email: paul.furtmueller@boku.ac.at;

Andreas Kubin, Planta Naturstoffe, Erlgasse 48, A-1120 Vienna, Austria, email: a.kubin@planta.at

**Supplementary Figure S1:** IC<sub>50</sub> plots of inhibition of EPO halogenation activity. Figure A-N shows the effect of the different inhibitors on the halide oxidation of 100 mM bromide by 20 nM EPO and 200  $\mu$ M hydrogen peroxide. Reactions were carried out in 100 mM phosphate buffer, pH 7, at 25 °C, Data are means of triplicate experiments. The inhibitory effect of each inhibitor was measured by determining the concentration at which it inhibited oxidation of MCD by 50% (IC<sub>50</sub>).

**A**

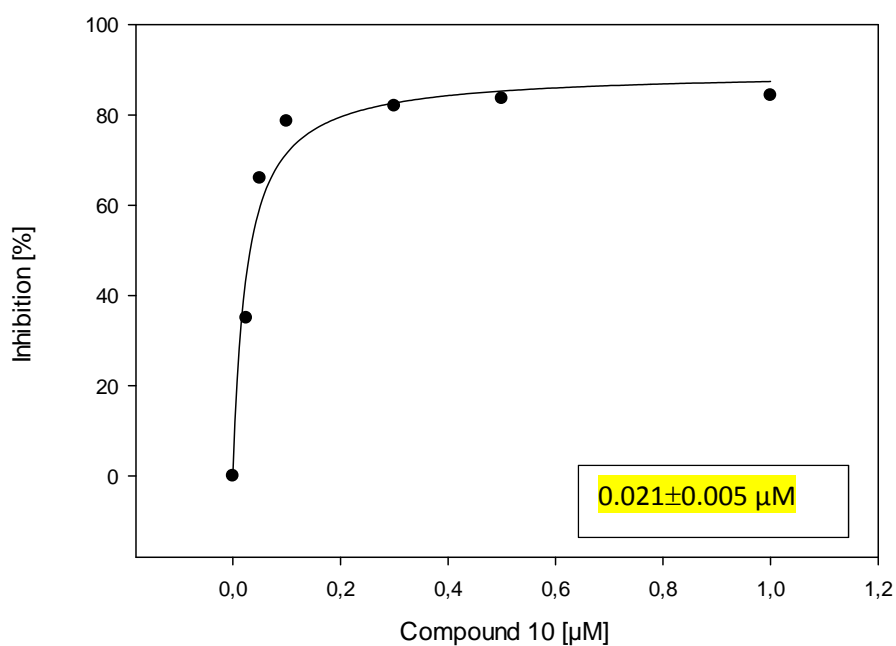

**B**

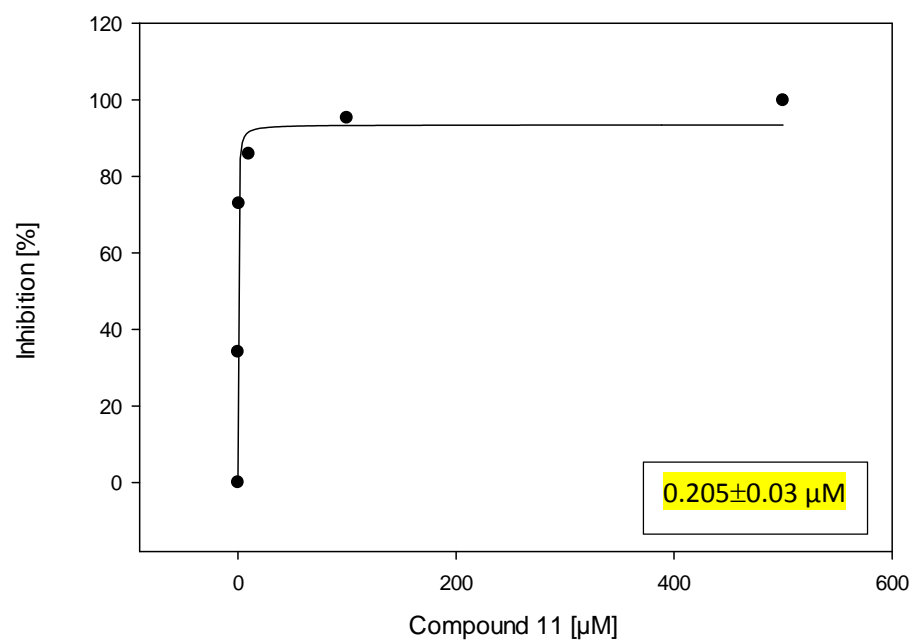

**C**

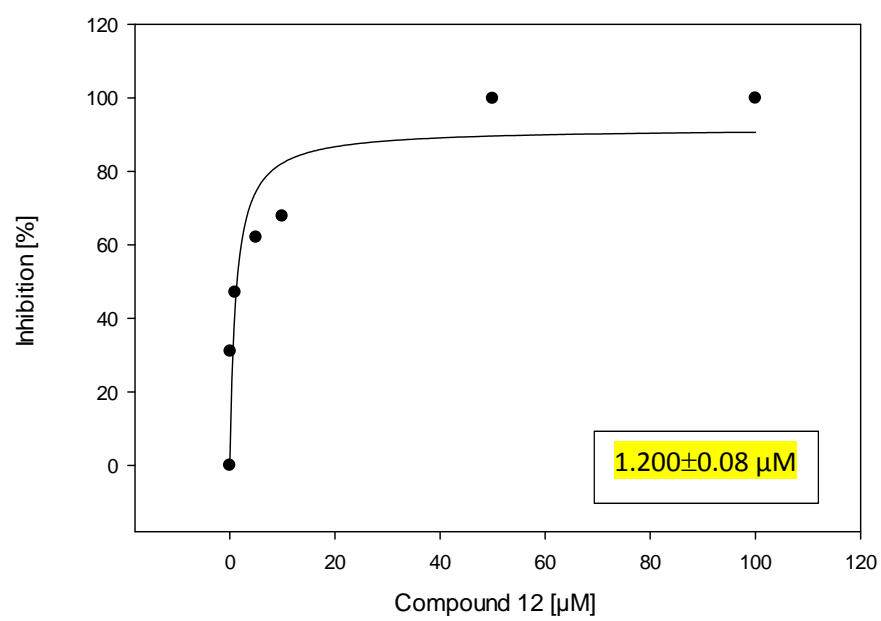

**D**

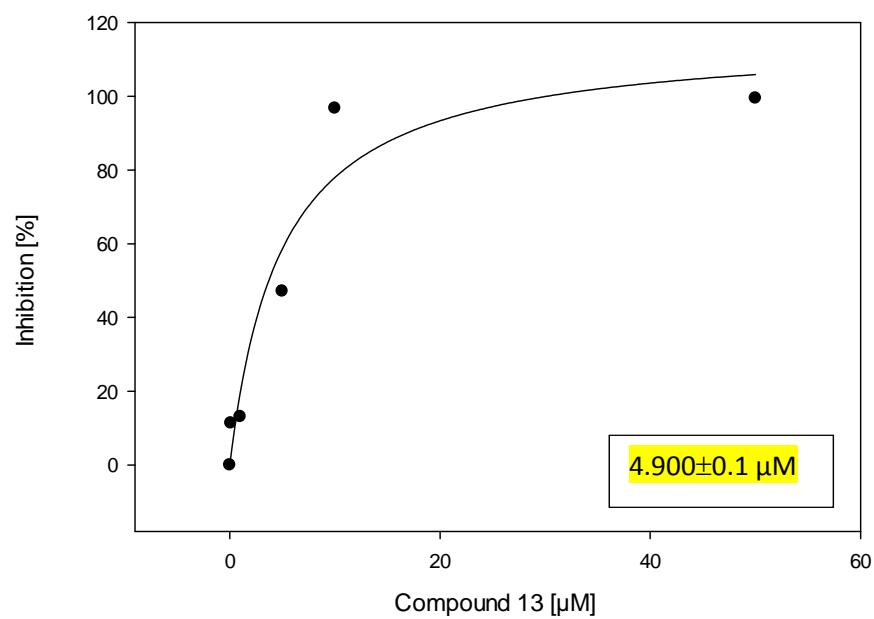

**E**

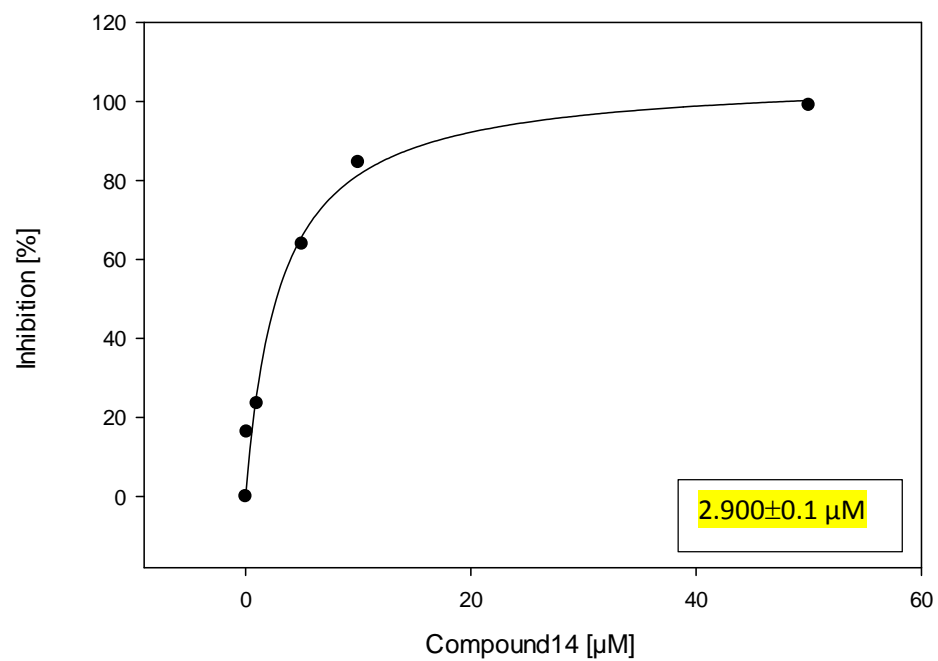

**F**

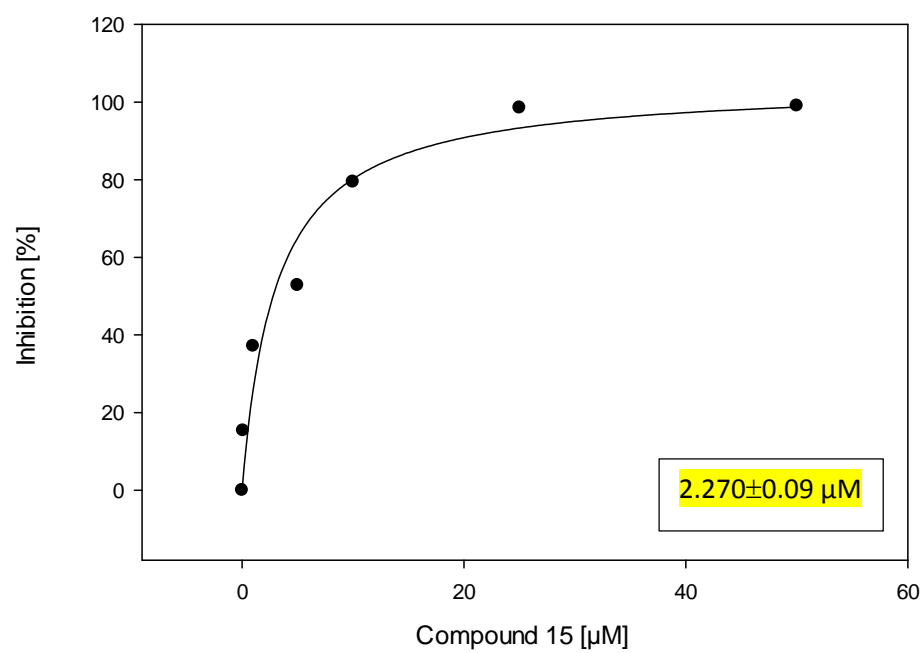

**G**

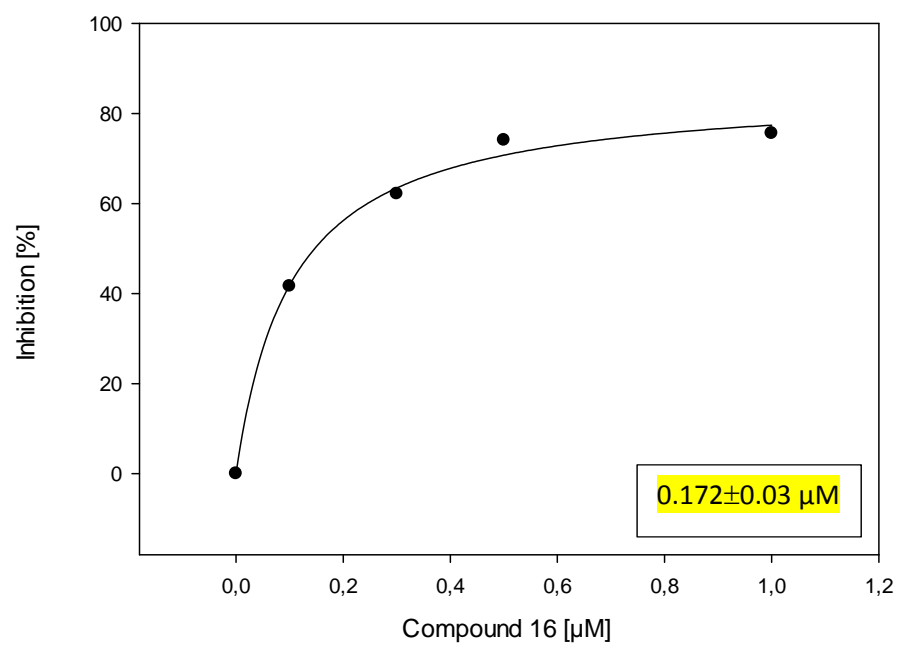

**H**

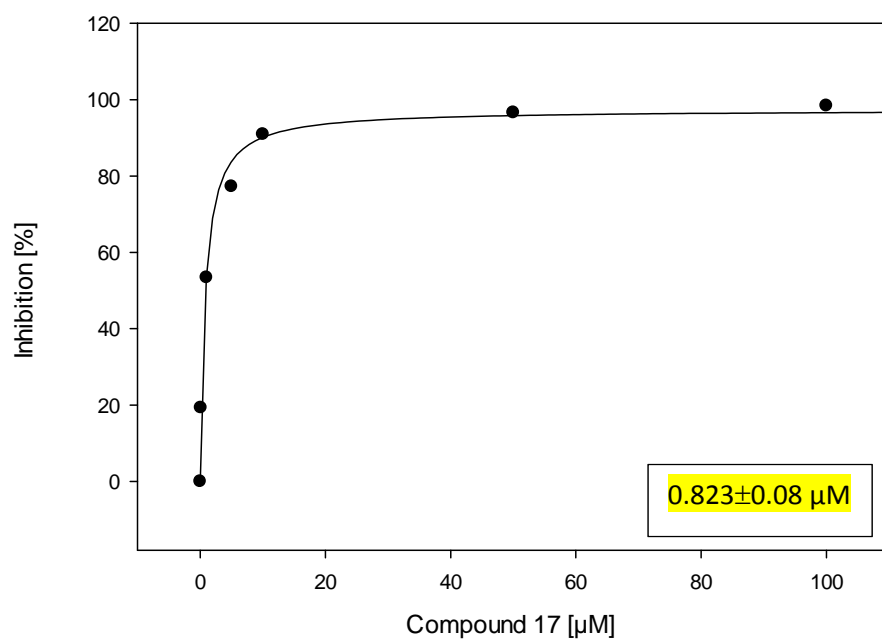

**I**

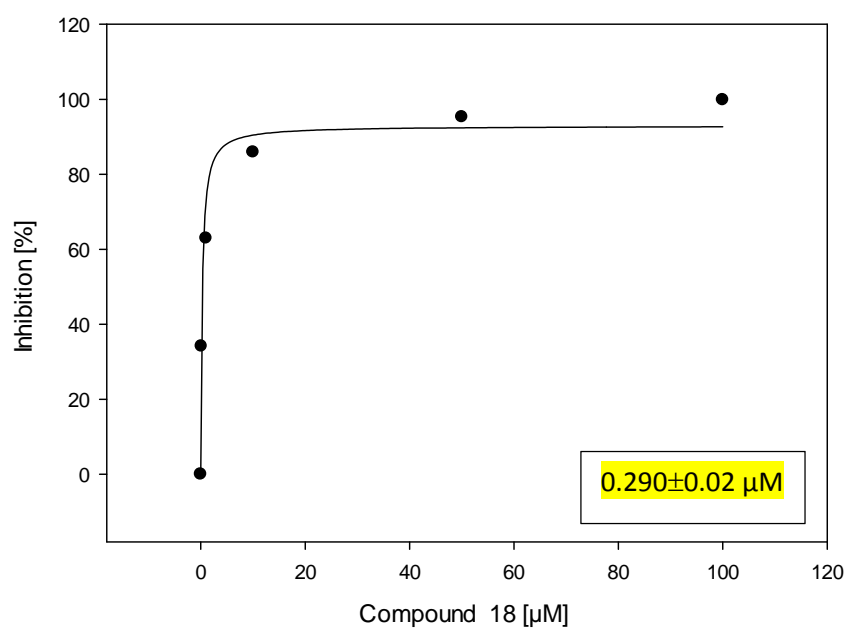

**J**

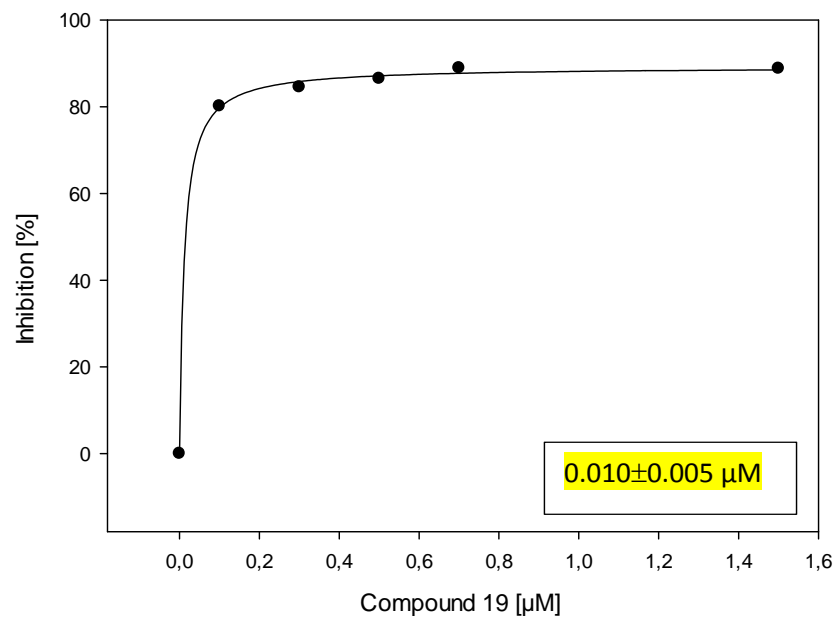

**K**

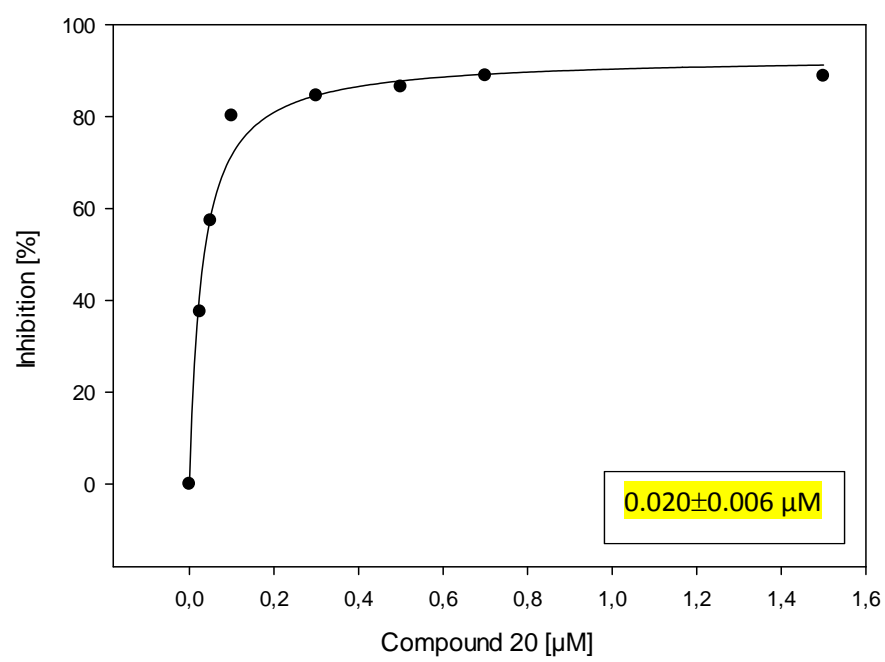

**L**

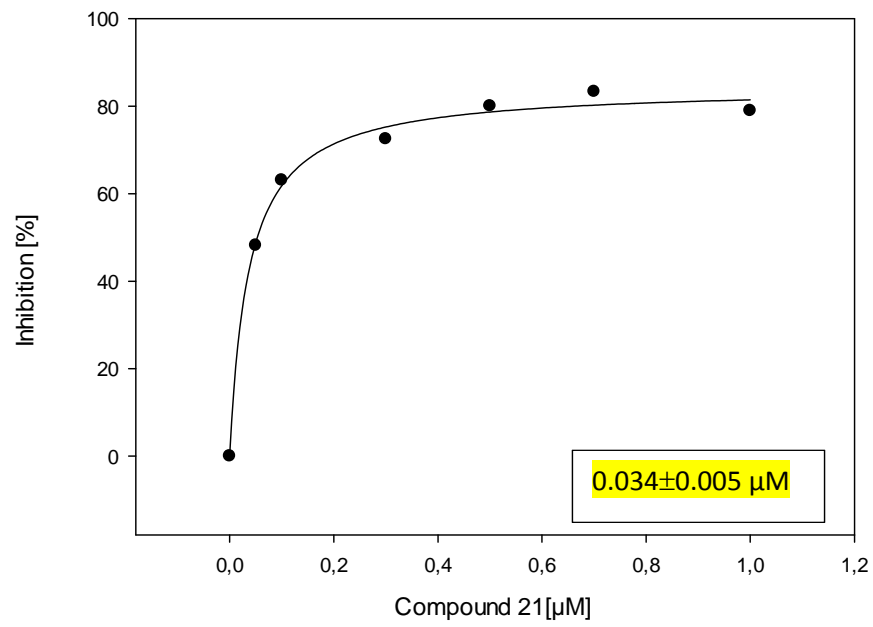

**M**

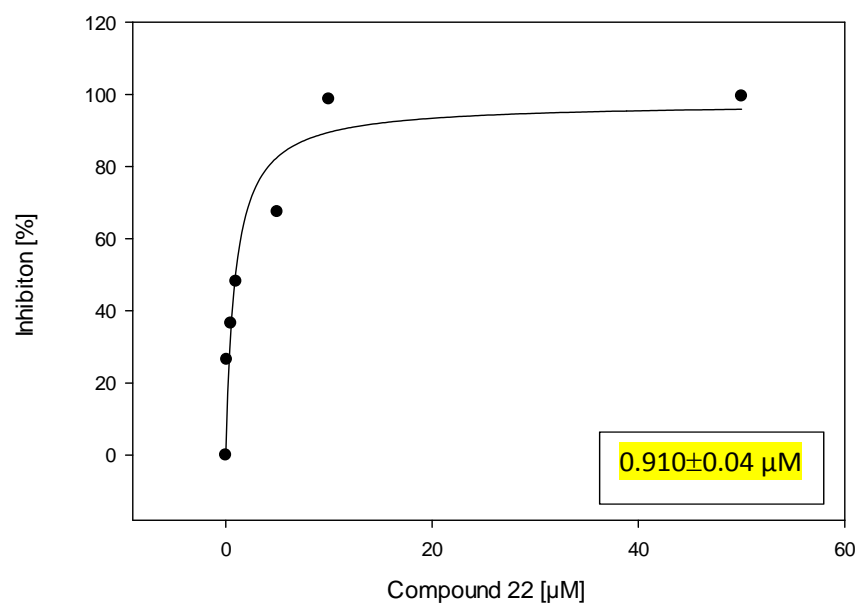



N

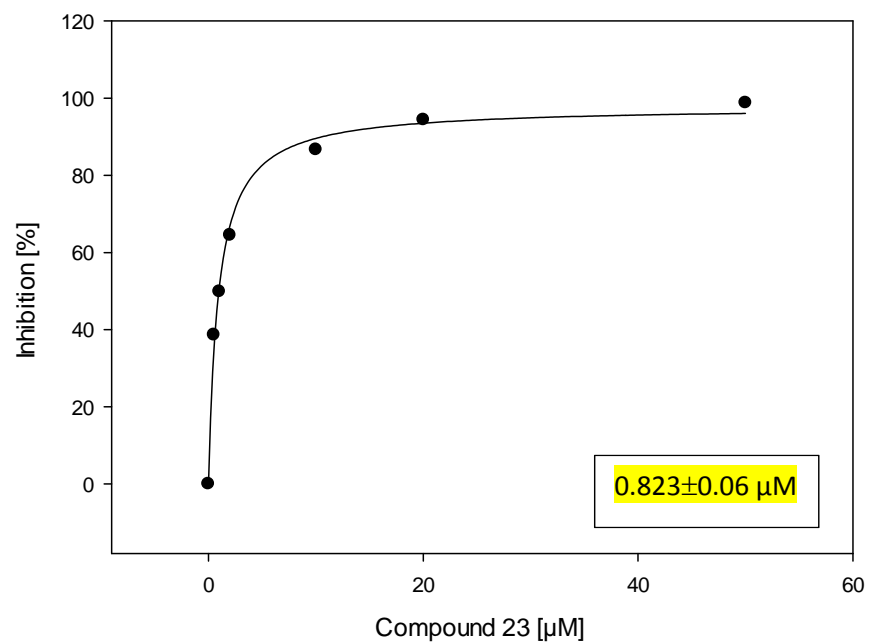

Supplement: Supplementary file 2 [file 1]
